# Supplementary material
Source: publisher site journal article supplement (https://www.dovepress.com/article/592969)
Supplement: Supplementary file 1 [file 592969%20Supplementary%20Table%201.docx]

**Supplementary Table1 Venipuncture Assessment Marking Criteria**

| **Steps** | **Scoring points** | **Total Score** | **Score** |
| --- | --- | --- | --- |
| **Pre-operation Preparation** | Prepare and check necessary items: 0 points for no check, 1 point for incomplete check, 2 points for complete and thorough check | 2 |  |
| Wear mask and cap | 2 |  |
| Perform handwashing with seven steps: 0 points for no handwashing, 1 point for incorrect steps, 2 points for correct handwashing | 2 |  |
| Put on gloves (omit this step, full score given uniformly) | 2 |  |
| Verify patient information: 0 points for no verification, 1 point for verification without using questioning, 2 points for correct verification | 2 |  |
| Self-introduction (1 point), explain the purpose of the operation (1 point) | 2 |  |
| Inquire about allergy history (1 point), verify patient's preparation status (1 point) | 2 |  |
| Assist patient in positioning (1 point), expose puncture site (1 point) | 2 |  |
| **Pre-puncture Operations** | Determine puncture point: 0 points for no determination, 2 points for verbal description, 4 points for actual operation | 4 |  |
| Correctly tie a tourniquet on the arm near the puncture point and ask the patient to clench their fist (0 points for no tourniquet, 2 points for correct tie, 2 points for clenching fist) | 4 |  |
| Locally disinfect the puncture site (0 points for no disinfection, 2 points for one disinfection, 2 points deducted for improper technique) | 4 |  |
| Check the validity and sealing of the blood collection needle packaging, ensure the needle is unobstructed and not bent (deduct 4 points for no inspection) | 4 |  |
| **Puncture Process** | Use left hand to stabilize the skin at the puncture point (0 points for no stabilization) | 2 |  |
| Position the needle bevel upward | 2 |  |
| Use right hand to hold the blood collection needle and insert it into the puncture point stabilized by the left hand | 4 |  |
| Direct the needle along the vein (deduct 2 points for lateral insertion) | 4 |  |
| Insert the needle at a 30-degree angle to the skin at the puncture site | 2 |  |
| Observe for a small amount of blood return (0 points for no blood return) | 4 |  |
| Advance the needle slightly along the vein | 2 |  |
| Connect the blood collection tube (0 points for repeated insertion and removal of the tube) | 4 |  |
| Release the tourniquet | 2 |  |
| Ask the patient to relax their fist | 2 |  |
| Collect the appropriate amount of specimen (2ml) | 2 |  |
| Remove the blood collection tube | 2 |  |
| Withdraw the needle | 2 |  |
| Apply local pressure (verbal instruction to apply pressure for 5 minutes, deduct 1 point for omission) | 2 |  |
| Mix the specimen | 2 |  |
| Attach the label | 2 |  |
| **Post-puncture Handling** | Inform the patient of precautions | 4 |  |
| Correctly dispose of items: needles in sharps container, other medical waste in yellow trash bin | 4 |  |
| Assist the patient in dressing and positioning comfortably | 4 |  |
| Provide additional instructions | 4 |  |
| Document the puncture process | 2 |  |
| **Professionalism and Humanistic Care** | Strong aseptic concept | 2 |  |
| Show care and tenderness towards the patient | 2 |  |
| Respect the patient and prioritize communication | 2 |  |
| Proficient and standardized operation techniques | 2 |  |
| Neat and professional attire | 2 |  |
